# Supplementary figures and images for: Luminescent enhancement in ZrO2:Tb3+, Gd3+nanoparticles by active-shell modification
Source: Royal Society of Chemistry journal article supplement (doi:10.1039/c3ce41617h), 2013-11-01

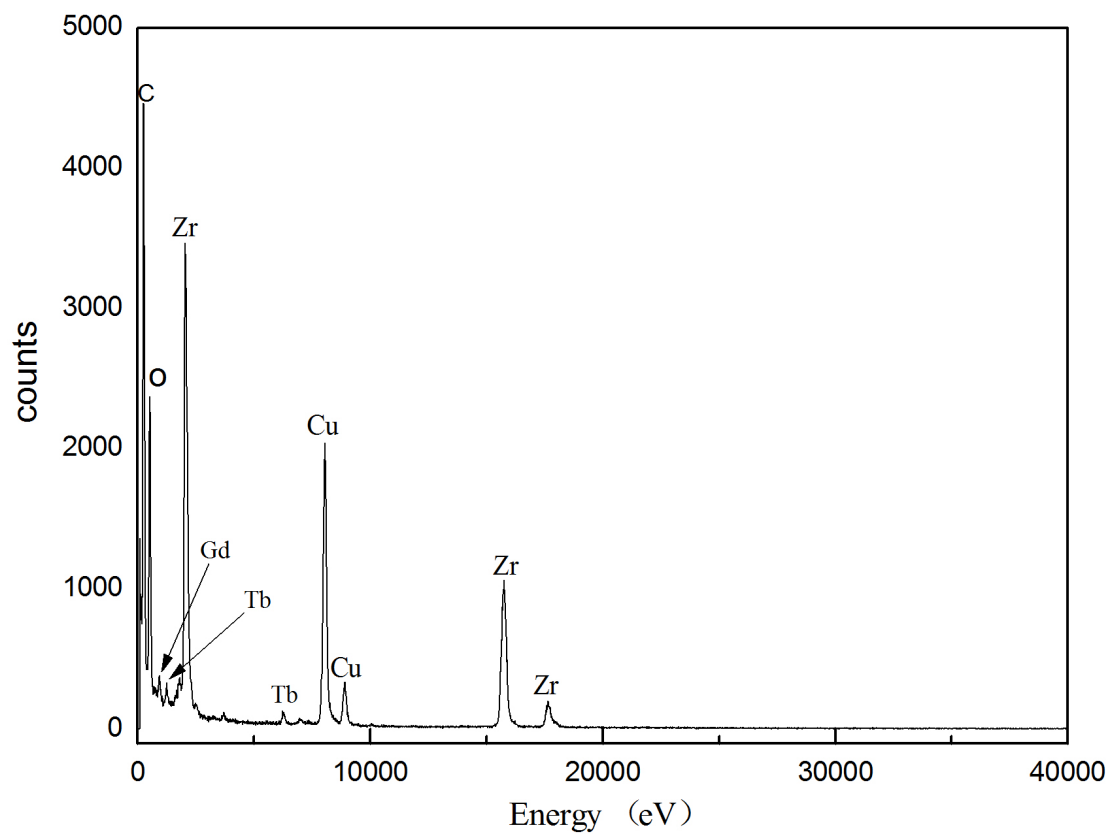

Fig. 1 EDX spectrum of ZrO<sub>2</sub> nanoparticles

Supplement: c3ce41617h.pdf [file c3ce41617h.pdf]
